# Supplementary material for: Exposure to Ambient Air Pollution and Cognitive Impairment in Community-Dwelling Older Adults: The Korean Frailty and Aging Cohort Study
Source: PubMed Central journal article supplement (PMC6801547; doi:10.3390/ijerph16193767), 2019-10-07
Supplement: ijerph-16-03767-s001.pdf [file ijerph-16-03767-s001.pdf]

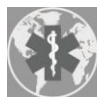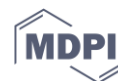

**Table S1.** Distribution of annual concentrations of air pollutants and meteorological data in 2013-2017.

| Variables                             | Mean | SD    | IQR  | Percentiles |      |      |      |         |
|---------------------------------------|------|-------|------|-------------|------|------|------|---------|
|                                       |      |       |      | Minimum     | 25th | 50th | 75th | Maximum |
| Air pollution                         |      |       |      |             |      |      |      |         |
| PM <sub>2.5</sub> , µg/m <sup>3</sup> | 25.5 | 1.5   | 2.0  | 23.4        | 24.5 | 25.1 | 26.5 | 28.5    |
| PM <sub>10</sub> , µg/m <sup>3</sup>  | 47.1 | 4.6   | 5.4  | 37.2        | 44.4 | 47.0 | 49.8 | 61.4    |
| CO, 10 ppm                            | 5.3  | 0.8   | 1.2  | 3.6         | 5.0  | 5.1  | 6.2  | 6.4     |
| SO <sub>2</sub> , ppb                 | 4.5  | 0.9   | 1.4  | 3.0         | 3.9  | 4.9  | 5.3  | 5.7     |
| NO <sub>2</sub> , ppb                 | 23.6 | 7.7   | 13.5 | 10.0        | 18.1 | 25.6 | 31.6 | 34.5    |
| O <sub>3</sub> , ppb                  | 26.3 | 4.3   | 5.2  | 21.6        | 22.6 | 23.9 | 28.7 | 36.5    |
| Weather conditions                    |      |       |      |             |      |      |      |         |
| Temperature, °C                       | 13.2 | 10.3  | 20.4 | -3.4        | 2.7  | 14.8 | 23.1 | 28.0    |
| Rainfall, mm                          | 87.2 | 126.2 | 63.3 | 1.0         | 23.2 | 47.2 | 86.5 | 676.2   |
| Wind speed, m/s                       | 2.5  | 0.37  | 0.6  | 1.8         | 2.2  | 2.4  | 2.8  | 3.4     |

SD: standard deviation, IQR: interquartile range, PM<sub>2.5</sub>: particulate matter < 2.5 µm in diameter, PM<sub>10</sub>: particulate matter < 10 µm in diameter, NO<sub>2</sub>: nitrogen dioxide, SO<sub>2</sub>: sulfur dioxide, CO: carbon monoxide, O<sub>3</sub>: ozone. The concentration of PM<sub>2.5</sub> was measured from 2015 to 2017. Mean levels of temperature, rainfall and wind speed per monthly were shown at Seoul (Lat. (N) 37°34', Long. (E) 126°57') in 2013-2017. [http://www.weather.go.kr/weather/climate/average\\_world\\_monthly.jsp](http://www.weather.go.kr/weather/climate/average_world_monthly.jsp).

**Table S2.** Correlations between cognitive scales and the annual concentrations of air pollutants, 2013-2017 (PM<sub>2.5</sub>: 2015-2017).

| Air Pollutants    | Global Cognition   | Attention           |                      | Memory             |                    |                    | Executive Function    | PM <sub>2.5</sub>  | PM <sub>10</sub> | CO                | SO <sub>2</sub>   | NO <sub>2</sub>   | O <sub>3</sub>    |                    |
|-------------------|--------------------|---------------------|----------------------|--------------------|--------------------|--------------------|-----------------------|--------------------|------------------|-------------------|-------------------|-------------------|-------------------|--------------------|
|                   | MMSE-KC            | Digit Span -Forward | Digit Span -Backward | Word List Memory   | Word List Recall   | Recall Storage (%) | Word List Recognition |                    |                  |                   |                   |                   |                   | FAB_Score          |
| PM <sub>2.5</sub> | -0.16 <sup>1</sup> | -0.14 <sup>1</sup>  | -0.13 <sup>1</sup>   | -0.161             | -0.141             | -0.09 <sup>1</sup> | -0.10 <sup>1</sup>    | -0.16 <sup>1</sup> | 1.00             | 0.49 <sup>1</sup> | 0.38 <sup>1</sup> | 0.10 <sup>3</sup> | 0.10 <sup>1</sup> | -0.19 <sup>1</sup> |
| PM <sub>10</sub>  | 0.02               | 0.01                | 0.06 <sup>2</sup>    | -0.07 <sup>1</sup> | -0.05 <sup>3</sup> | -0.03              | -0.05 <sup>3</sup>    | 0.02               |                  | 1.00              | 0.68 <sup>1</sup> | 0.19 <sup>1</sup> | 0.22 <sup>1</sup> | -0.28 <sup>1</sup> |
| CO                | 0.08 <sup>1</sup>  | 0.01                | 0.06 <sup>3</sup>    | -0.04              | -0.03              | -0.02              | -0.06 <sup>2</sup>    | 0.07 <sup>1</sup>  |                  |                   | 1.00              | 0.49 <sup>1</sup> | 0.47 <sup>1</sup> | -0.59 <sup>1</sup> |
| SO <sub>2</sub>   | 0.08 <sup>1</sup>  | 0.06 <sup>2</sup>   | 0.07 <sup>1</sup>    | 0.08 <sup>1</sup>  | 0.02               | -0.04 <sup>3</sup> | 0.01                  | 0.04 <sup>3</sup>  |                  |                   |                   | 1.00              | 0.84 <sup>1</sup> | -0.71 <sup>1</sup> |
| NO <sub>2</sub>   | 0.07 <sup>1</sup>  | -0.01               | 0.11 <sup>1</sup>    | 0.07 <sup>1</sup>  | 0.01               | -0.02              | -0.01                 | 0.05 <sup>3</sup>  |                  |                   |                   |                   | 1.00              | -0.90 <sup>1</sup> |
| O <sub>3</sub>    | -0.10 <sup>1</sup> | 0.02                | -0.17 <sup>1</sup>   | -0.08 <sup>2</sup> | -0.03              | 0.02               | -0.01                 | -0.12 <sup>1</sup> |                  |                   |                   |                   |                   | 1.00               |

<sup>1</sup>*P* < 0.05, <sup>2</sup>*P* < 0.01, <sup>3</sup>*P* < 0.05. Spearman's correlation analysis was used, because of non-nominal distribution. PM<sub>2.5</sub>: particulate matter < 2.5 μm in diameter, PM<sub>10</sub>: particulate matter < 10 μm in diameter, NO<sub>2</sub>: nitrogen dioxide, SO<sub>2</sub>: sulfur dioxide, CO: carbon monoxide, O<sub>3</sub>: ozone. MMSE-KC: Korean version of the Mini-Mental State Examination; FAB\_score: total Frontal assessment battery score.
